# Supplementary material for: In breast cancer subtypes steroid sulfatase (STS) is associated with less aggressive tumour characteristics
Source: PubMed Central journal article supplement (PMC5943586; doi:10.1038/s41416-018-0034-9), 2018-03-22
Supplement: 41416_2018_34_MOESM1_ESM.pdf [file 41416_2018_34_MOESM1_ESM.pdf]

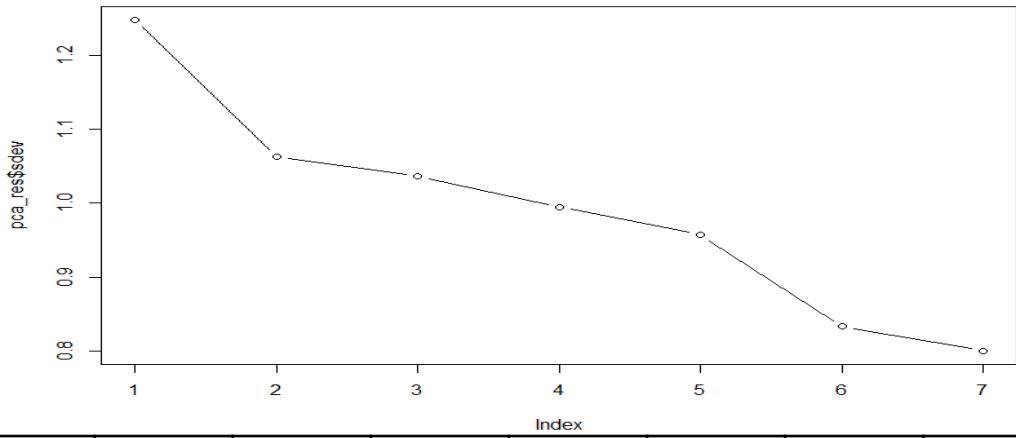

|                        | PC1    | PC2    | PC3    | PC4    | PC5    | PC6     | PC7     |
|------------------------|--------|--------|--------|--------|--------|---------|---------|
| Standard deviation     | 1.2478 | 1.0628 | 1.0366 | 0.9946 | 0.9572 | 0.83270 | 0.80004 |
| Proportion of Variance | 0.2224 | 0.1614 | 0.1535 | 0.1413 | 0.1309 | 0.09906 | 0.09144 |
| Cumulative Proportion  | 0.2224 | 0.3838 | 0.5373 | 0.6786 | 0.8095 | 0.90856 | 1.00000 |

|          | PC1    | PC2    | PC3    | PC4    | PC5    | PC6    | PC7    |
|----------|--------|--------|--------|--------|--------|--------|--------|
| ARHscore | -0,406 | -0,128 | 0,150  | 0,652  | 0,321  | -0,515 | -0,049 |
| GRHscore | -0,504 | 0,415  | -0,052 | 0,022  | 0,329  | 0,464  | 0,497  |
| FOXA1LI  | -0,340 | -0,411 | -0,540 | -0,186 | 0,328  | 0,227  | -0,480 |
| AROMcomb | -0,441 | 0,271  | 0,518  | -0,105 | -0,293 | 0,171  | -0,581 |
| HSDtype2 | -0,357 | -0,347 | 0,264  | -0,646 | 0,023  | -0,391 | 0,334  |
| STERSULF | 0,199  | -0,551 | 0,554  | 0,155  | 0,269  | 0,499  | 0,069  |
| KI67JAP  | 0,323  | 0,381  | 0,197  | -0,295 | 0,723  | -0,189 | -0,258 |

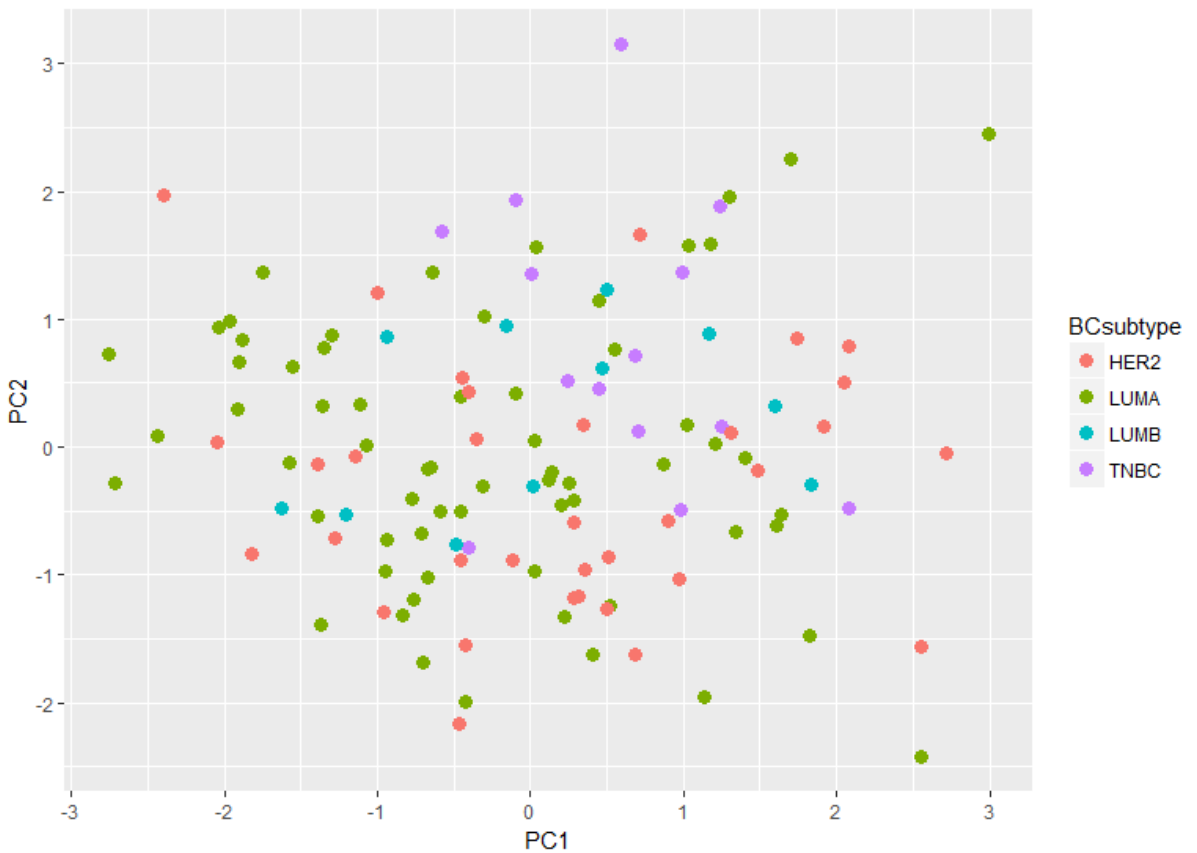

Supplementary Figure 2 Principal component analysis of the dataset

|                 | estimate | odds_ratio | p.value |
|-----------------|----------|------------|---------|
| ER              | 0.20     | 1.224      | 0.73    |
| PGR             | -0.46    | 0.631      | 0.40    |
| AR              | -0.81    | 0.444      | 0.45    |
| HER2            | -0.33    | 0.721      | 0.56    |
| GR              | 1.21     | 3.354      | 0.05    |
| STS             | -0.28    | 0.757      | 0.62    |
| 17 $\beta$ HSD2 | -0.69    | 0.503      | 0.39    |
| ER $\beta$ 1    | 0.00     | 0.998      | 0.63    |
| Aromatase       | -0.09    | 0.914      | 0.72    |

| Metastatic site | Overall          |              |     |    | ERa Status       |              |     |   |                  |              |     |    | PGR              |              |     |   |                  |              |     |    | HER2 over expression |              |     |    |                  |              |     |   |
|-----------------|------------------|--------------|-----|----|------------------|--------------|-----|---|------------------|--------------|-----|----|------------------|--------------|-----|---|------------------|--------------|-----|----|----------------------|--------------|-----|----|------------------|--------------|-----|---|
|                 |                  |              |     |    | Negative         |              |     |   | Positive         |              |     |    | Negative         |              |     |   | Positive         |              |     |    | Negative             |              |     |    | Positive         |              |     |   |
|                 | no metastasis, % | Metastasis % | N   |    | no metastasis, % | Metastasis % | N   |   | no metastasis, % | Metastasis % | N   |    | no metastasis, % | Metastasis % | N   |   | no metastasis, % | Metastasis % | N   |    | no metastasis, %     | Metastasis % | N   |    | no metastasis, % | Metastasis % | N   |   |
|                 |                  |              |     |    |                  |              |     |   |                  |              |     |    |                  |              |     |   |                  |              |     |    |                      |              |     |    |                  |              |     |   |
| Bone            | 86%              | 119          | 14% | 20 | 100%             | 36           | 0%  | 0 | 81%              | 83           | 19% | 20 | 92%              | 68           | 8%  | 6 | 78%              | 51           | 22% | 14 | 85%                  | 84           | 15% | 15 | 88%              | 35           | 13% | 5 |
| Liver           | 87%              | 121          | 13% | 18 | 97%              | 35           | 3%  | 1 | 83%              | 86           | 17% | 17 | 89%              | 66           | 11% | 8 | 85%              | 55           | 15% | 10 | 89%                  | 88           | 11% | 11 | 83%              | 33           | 18% | 7 |
| Lymph Nodes     | 92%              | 128          | 8%  | 11 | 92%              | 33           | 8%  | 3 | 92%              | 95           | 8%  | 8  | 92%              | 68           | 8%  | 6 | 92%              | 60           | 8%  | 5  | 92%                  | 91           | 8%  | 8  | 93%              | 37           | 8%  | 3 |
| Skin            | 92%              | 128          | 8%  | 11 | 86%              | 31           | 14% | 5 | 94%              | 97           | 6%  | 6  | 92%              | 68           | 8%  | 6 | 92%              | 60           | 8%  | 5  | 93%                  | 92           | 7%  | 7  | 90%              | 36           | 10% | 4 |
| Brain           | 94%              | 130          | 6%  | 9  | 97%              | 35           | 3%  | 1 | 92%              | 95           | 8%  | 8  | 91%              | 67           | 9%  | 7 | 97%              | 63           | 3%  | 2  | 94%                  | 93           | 6%  | 6  | 93%              | 37           | 8%  | 3 |
| Lung            | 94%              | 130          | 6%  | 9  | 94%              | 34           | 6%  | 2 | 93%              | 96           | 7%  | 7  | 89%              | 66           | 11% | 8 | 98%              | 64           | 2%  | 1  | 94%                  | 93           | 6%  | 6  | 93%              | 37           | 8%  | 3 |
| Colon           | 97%              | 135          | 3%  | 4  | 92%              | 33           | 8%  | 3 | 99%              | 102          | 1%  | 1  | 96%              | 71           | 4%  | 3 | 98%              | 64           | 2%  | 1  | 99%                  | 98           | 1%  | 1  | 93%              | 37           | 8%  | 3 |
| Pleura          | 97%              | 135          | 3%  | 4  | 94%              | 34           | 6%  | 2 | 98%              | 101          | 2%  | 2  | 97%              | 72           | 3%  | 2 | 97%              | 63           | 3%  | 2  | 99%                  | 98           | 1%  | 1  | 93%              | 37           | 8%  | 3 |
| Bone Marrow     | 99%              | 138          | 1%  | 1  | 100%             | 36           | 0%  | 0 | 99%              | 102          | 1%  | 1  | 99%              | 73           | 1%  | 1 | 100%             | 65           | 0%  | 0  | 99%                  | 98           | 1%  | 1  | 100%             | 40           | 0%  | 0 |
| Spleen          | 99%              | 138          | 1%  | 1  | 100%             | 36           | 0%  | 0 | 99%              | 102          | 1%  | 1  | 99%              | 73           | 1%  | 1 | 100%             | 65           | 0%  | 0  | 99%                  | 98           | 1%  | 1  | 100%             | 40           | 0%  | 0 |

|             | Overall          |              |     |    | AR               |              |     |   |                  |              |     |    | GR               |              |    |   |                  |              |     |    | ERβ1             |              |     |    |                  |              |     |     |    |
|-------------|------------------|--------------|-----|----|------------------|--------------|-----|---|------------------|--------------|-----|----|------------------|--------------|----|---|------------------|--------------|-----|----|------------------|--------------|-----|----|------------------|--------------|-----|-----|----|
|             |                  |              |     |    | Negative         |              |     |   | Positive         |              |     |    | Negative         |              |    |   | Positive         |              |     |    | <150             |              |     |    | >150             |              |     |     |    |
|             | no metastasis, % | Metastasis % | N   |    | no metastasis, % | Metastasis % | N   |   | no metastasis, % | Metastasis % | N   |    | no metastasis, % | Metastasis % | N  |   | no metastasis, % | Metastasis % | N   |    | no metastasis, % | Metastasis % | N   |    | no metastasis, % | Metastasis % | N   |     |    |
|             |                  |              |     |    |                  |              |     |   |                  |              |     |    |                  |              |    |   |                  |              |     |    |                  |              |     |    |                  |              |     |     |    |
| Bone        | 86%              | 119          | 14% | 20 | 94%              | 17           | 6%  | 1 | 85%              | 99           | 15% | 18 | 94%              | 60           | 6% | 4 | 79%              | 54           | 21% | 14 | 86%              | 56           | 14% | 14 | 9                | 85%          | 63  | 15% | 11 |
| Liver       | 87%              | 121          | 13% | 18 | 89%              | 16           | 11% | 2 | 87%              | 102          | 13% | 15 | 92%              | 59           | 8% | 5 | 85%              | 58           | 15% | 10 | 85%              | 55           | 15% | 10 | 89%              | 66           | 11% | 8   |    |
| Lymph Nodes | 92%              | 128          | 8%  | 11 | 89%              | 16           | 11% | 2 | 92%              | 108          | 8%  | 9  | 92%              | 59           | 8% | 5 | 91%              | 62           | 9%  | 6  | 91%              | 59           | 9%  | 6  | 93%              | 69           | 7%  | 5   |    |
| Skin        | 92%              | 128          | 8%  | 11 | 94%              | 17           | 6%  | 1 | 91%              | 107          | 9%  | 10 | 94%              | 60           | 6% | 4 | 90%              | 61           | 10% | 7  | 89%              | 58           | 11% | 7  | 95%              | 70           | 5%  | 4   |    |
| Brain       | 94%              | 130          | 6%  | 9  | 94%              | 17           | 6%  | 1 | 93%              | 109          | 7%  | 8  | 95%              | 61           | 5% | 3 | 93%              | 63           | 7%  | 5  | 92%              | 60           | 8%  | 5  | 95%              | 70           | 5%  | 4   |    |
| Lung        | 94%              | 130          | 6%  | 9  | 83%              | 15           | 17% | 3 | 95%              | 111          | 5%  | 6  | 97%              | 62           | 3% | 2 | 91%              | 62           | 9%  | 6  | 92%              | 60           | 8%  | 5  | 95%              | 70           | 5%  | 4   |    |
| Colon       | 97%              | 135          | 3%  | 4  | 100%             | 18           | 0%  | 0 | 97%              | 113          | 3%  | 4  | 97%              | 62           | 3% | 2 | 97%              | 66           | 3%  | 2  | 95%              | 62           | 5%  | 3  | 99%              | 73           | 1%  | 1   |    |
| Pleura      | 97%              | 135          | 3%  | 4  | 100%             | 18           | 0%  | 0 | 97%              | 113          | 3%  | 4  | 97%              | 62           | 3% | 2 | 97%              | 66           | 3%  | 2  | 98%              | 64           | 2%  | 1  | 96%              | 71           | 4%  | 3   |    |
| Bone Marrow | 99%              | 138          | 1%  | 1  | 94%              | 17           | 6%  | 1 | 100%             | 117          | 0%  | 0  | 100%             | 64           | 0% | 0 | 99%              | 67           | 1%  | 1  | 98%              | 64           | 2%  | 1  | 100%             | 74           | 0%  | 0   |    |
| Spleen      | 99%              | 138          | 1%  | 1  | 100%             | 18           | 0%  | 0 | 99%              | 116          | 1%  | 1  | 100%             | 64           | 0% | 0 | 99%              | 67           | 1%  | 1  | 100%             | 65           | 0%  | 0  | 99%              | 73           | 1%  | 1   |    |

|             | Overall          |              |     |    | STS              |              |     |    |                  |              |    |   | 17βHSD2          |              |     |   |                  |              |     |    | Aromatase        |              |     |   |                  |              |     |    |
|-------------|------------------|--------------|-----|----|------------------|--------------|-----|----|------------------|--------------|----|---|------------------|--------------|-----|---|------------------|--------------|-----|----|------------------|--------------|-----|---|------------------|--------------|-----|----|
|             |                  |              |     |    | Negative         |              |     |    | Positive         |              |    |   | Negative         |              |     |   | Positive         |              |     |    | Arom 1-4         |              |     |   | Arom 5-6         |              |     |    |
|             | no metastasis, % | Metastasis % | N   |    | no metastasis, % | Metastasis % | N   |    | no metastasis, % | Metastasis % | N  |   | no metastasis, % | Metastasis % | N   |   | no metastasis, % | Metastasis % | N   |    | no metastasis, % | Metastasis % | N   |   | no metastasis, % | Metastasis % | N   |    |
|             |                  |              |     |    |                  |              |     |    |                  |              |    |   |                  |              |     |   |                  |              |     |    |                  |              |     |   |                  |              |     |    |
| Bone        | 86%              | 119          | 14% | 20 | 75%              | 43           | 25% | 14 | 93%              | 75           | 7% | 6 | 88%              | 22           | 12% | 3 | 85%              | 96           | 15% | 17 | 85%              | 34           | 15% | 6 | 86%              | 85           | 14% | 14 |
| Liver       | 87%              | 121          | 13% | 18 | 81%              | 46           | 19% | 11 | 91%              | 74           | 9% | 7 | 88%              | 22           | 12% | 3 | 87%              | 98           | 13% | 15 | 83%              | 33           | 18% | 7 | 89%              | 88           | 11% | 11 |
| Lymph Nodes | 92%              | 128          | 8%  | 11 | 84%              | 48           | 16% | 9  | 98%              | 79           | 2% | 2 | 96%              | 24           | 4%  | 1 | 91%              | 103          | 9%  | 10 | 95%              | 38           | 5%  | 2 | 91%              | 90           | 9%  | 9  |
| Skin        | 92%              | 128          | 8%  | 11 | 88%              | 50           | 12% | 7  | 96%              | 78           | 4% | 3 | 100%             | 25           | 0%  | 0 | 91%              | 103          | 9%  | 10 | 95%              | 38           | 5%  | 2 | 91%              | 90           | 9%  | 9  |
| Brain       | 94%              | 130          | 6%  | 9  | 91%              | 52           | 9%  | 5  | 95%              | 77           | 5% | 4 | 96%              | 24           | 4%  | 1 | 93%              | 105          | 7%  | 8  | 95%              | 38           | 5%  | 2 | 93%              | 92           | 7%  | 7  |
| Lung        | 94%              | 130          | 6%  | 9  | 88%              | 50           | 12% | 7  | 98%              | 79           | 2% | 2 | 96%              | 24           | 4%  | 1 | 93%              | 105          | 7%  | 8  | 90%              | 36           | 10% | 4 | 95%              | 94           | 5%  | 5  |
| Colon       | 97%              | 135          | 3%  | 4  | 98%              | 56           | 2%  | 1  | 98%              | 79           | 2% | 2 | 100%             | 25           | 0%  | 0 | 97%              | 110          | 3%  | 3  | 98%              | 39           | 3%  | 1 | 97%              | 96           | 3%  | 3  |
| Pleura      | 97%              | 135          | 3%  | 4  | 98%              | 56           | 2%  | 1  | 98%              | 79           | 2% | 2 | 100%             | 25           | 0%  | 0 | 97%              | 110          | 3%  | 3  | 100%             | 40           | 0%  | 0 | 96%              | 95           | 4%  | 4  |
| Bone Marrow | 99%              | 138          | 1%  | 1  | 98%              | 56           | 2%  | 1  | 100%             | 81           | 0% | 0 | 100%             | 25           | 0%  | 0 | 99%              | 112          | 1%  | 1  | 98%              | 39           | 3%  | 1 | 100%             | 99           | 0%  | 0  |
| Spleen      | 99%              | 138          | 1%  | 1  | 100%             | 57           | 0%  | 0  | 99%              | 80           | 1% | 1 | 100%             | 25           | 0%  | 0 | 99%              | 112          | 1%  | 1  | 98%              | 39           | 3%  | 1 | 100%             | 99           | 0%  | 0  |

Supplementary Table 2 Site of metastasis and expression of markers in the primary.
